# Supplementary material for: Quantitative assessment of lncRNA HOTAIR polymorphisms and cancer risk in Chinese population: a meta-analysis based on 26,810 subjects
Source: PubMed Central journal article supplement (PMC5601769; doi:10.18632/oncotarget.19776), 2017-08-01
Supplement: oncotarget-08-59698-s001.pdf [file oncotarget-08-59698-s001.pdf]

# Quantitative assessment of lncRNA *HOTAIR* polymorphisms and cancer risk in Chinese population: a meta-analysis based on 26,810 subjects

## SUPPLEMENTARY MATERIALS

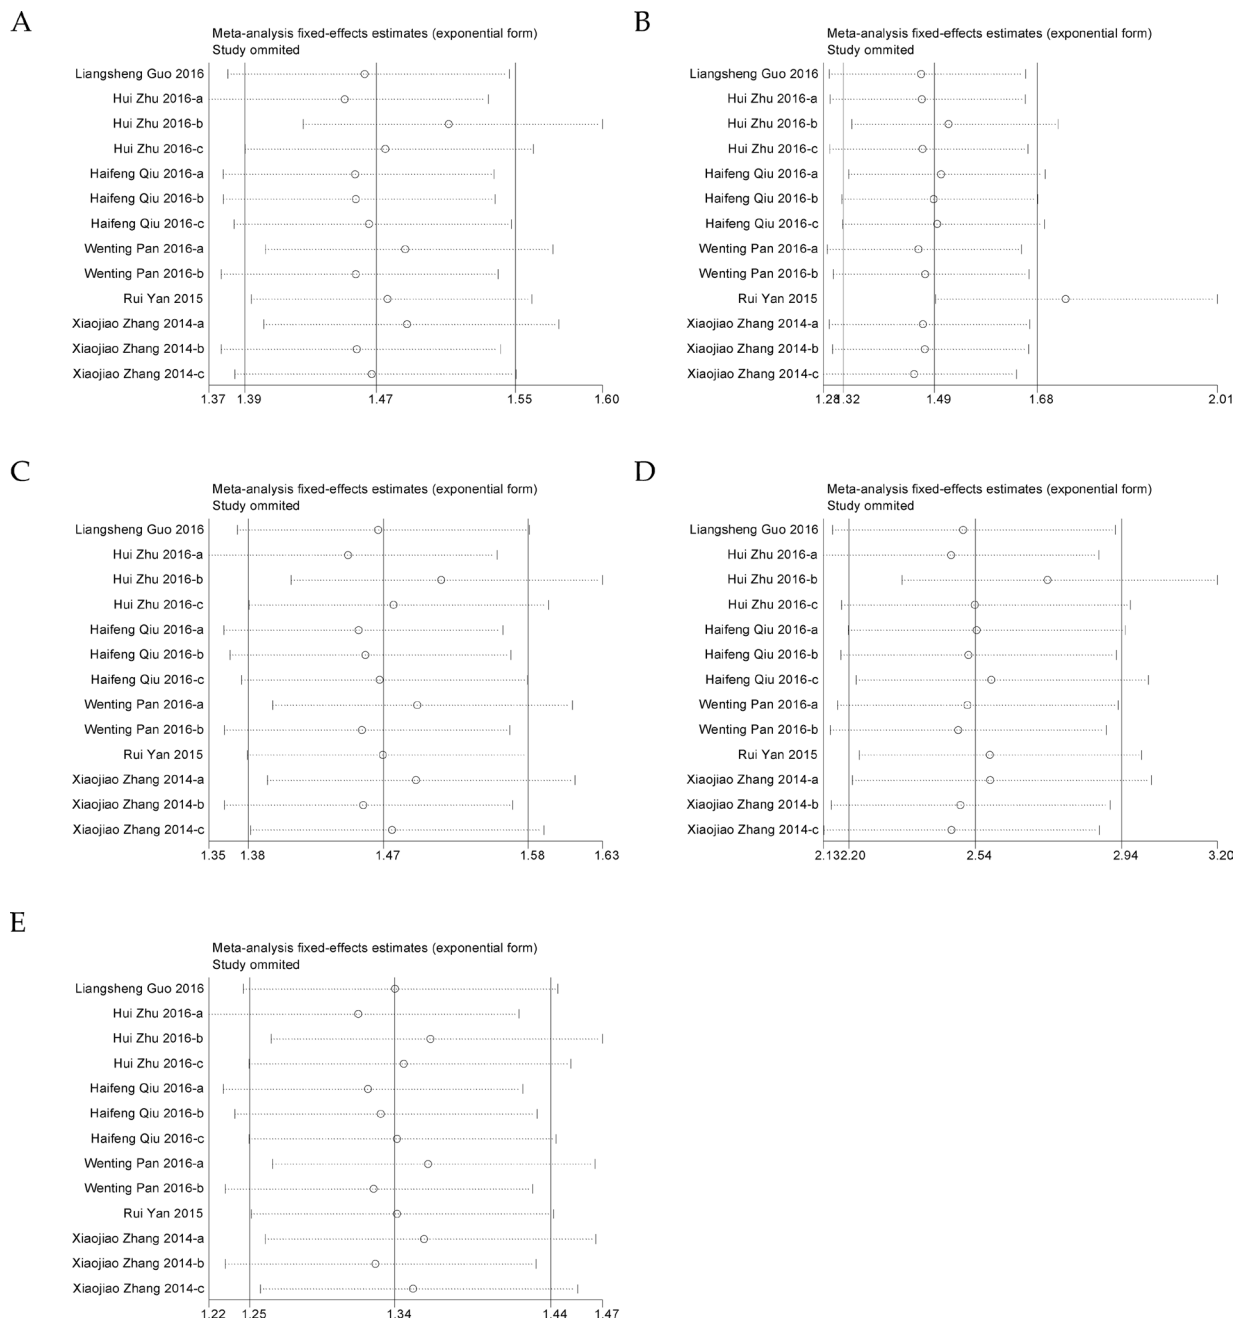

**Supplementary Figure 1: Sensitivity analyses for *HOTAIR* rs920778 polymorphism and cancer.** (A) allele model (T vs. C); (B) recessive model (TT vs. TC + CC); (C) dominant model (TC + TT vs. CC); (D) homozygous model (TT vs. CC); (E) heterozygous model (TC vs. CC).

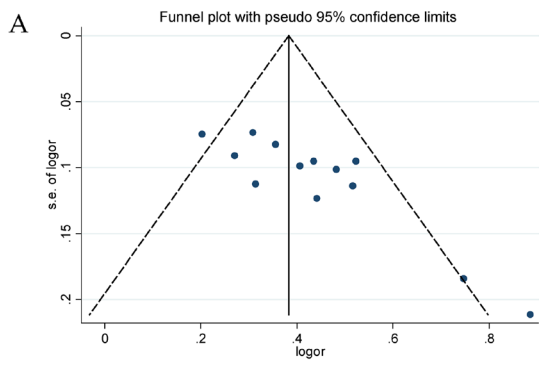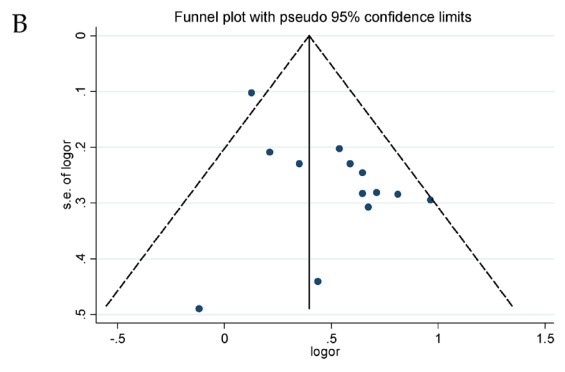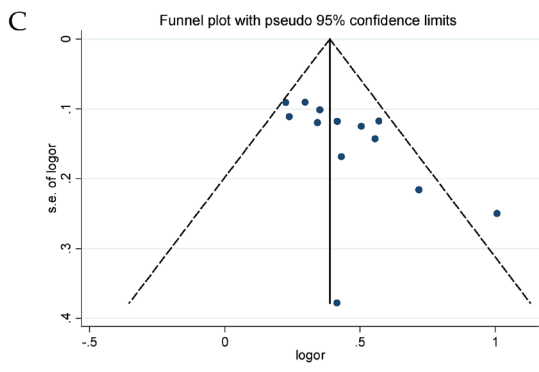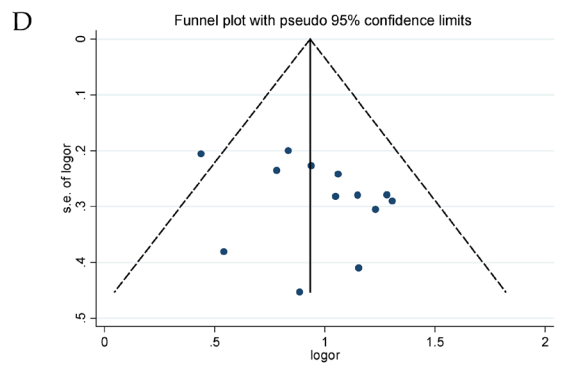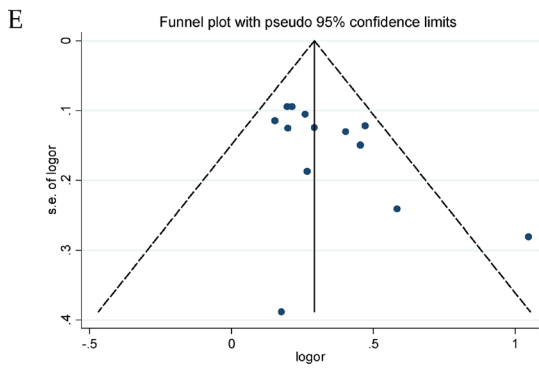

**Supplementary Figure 2: Funnel plots for *HOTAIR* rs920778 polymorphism and cancer. (A) allele model (T vs. C); (B) recessive model (TT vs. TC + CC); (C) dominant model (TC + TT vs. CC); (D) homozygous model (TT vs. CC); (E) heterozygous model (TC vs. CC).**

**A**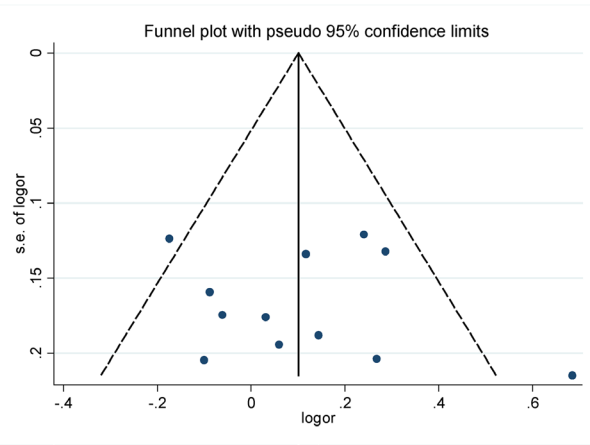**B**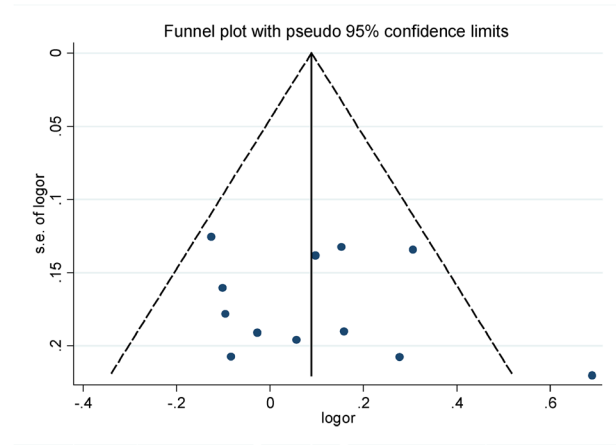

**Supplementary Figure 3: Funnel plots for *HOTAIR* rs4759314 polymorphism and cancer. (A) dominant model (GA + GG vs. AA); (B) heterozygous model (GA vs. AA).**

**A**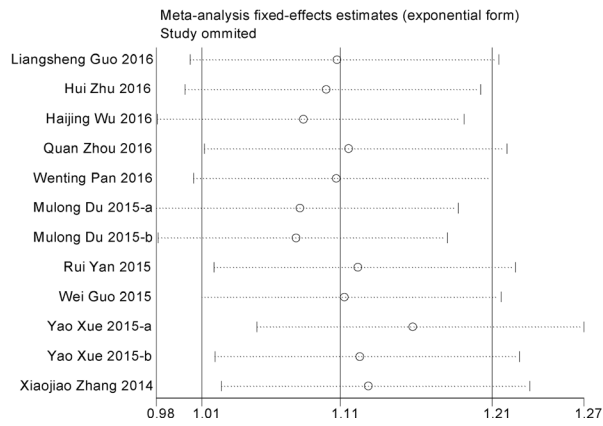**B**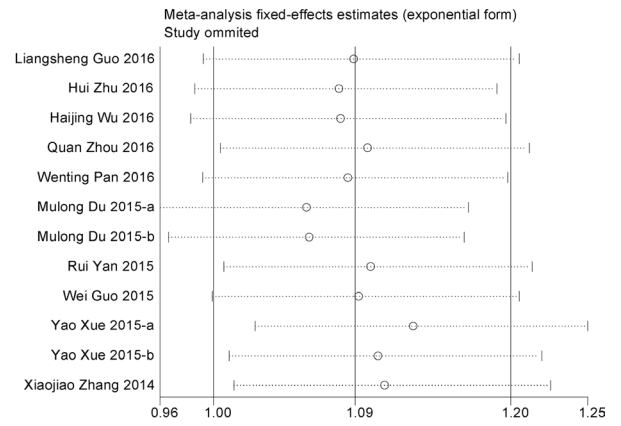

**Supplementary Figure 4: Sensitivity analyses for *HOTAIR* rs4759314 polymorphism and cancer. (A) dominant model (GA + GG vs. AA); (B) heterozygous model (GA vs. AA).**

A

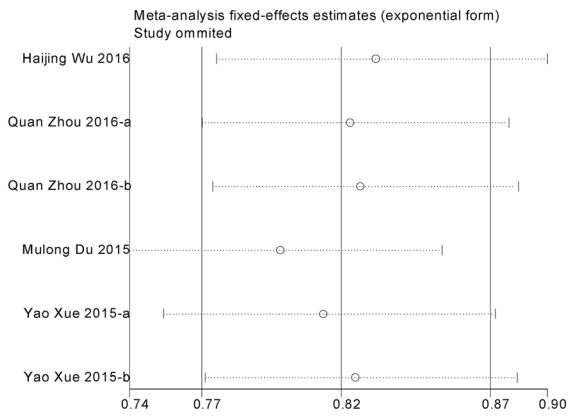

B

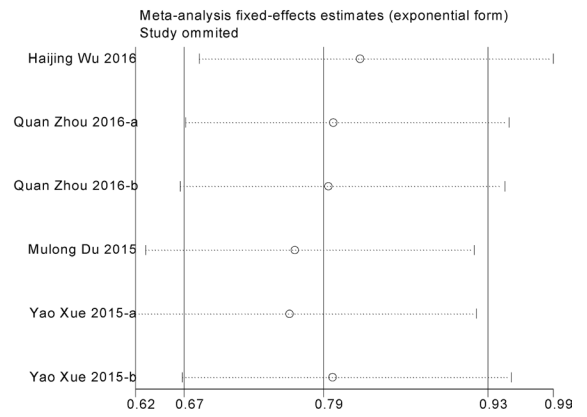

C

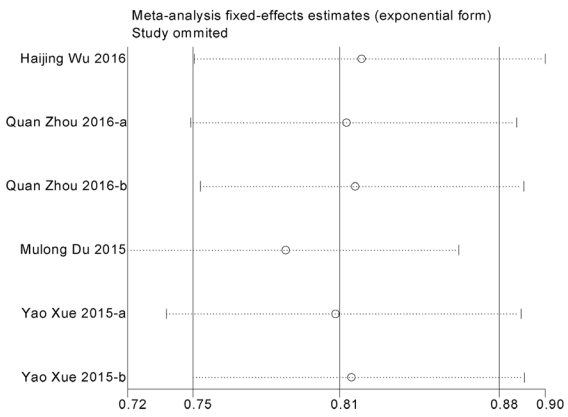

D

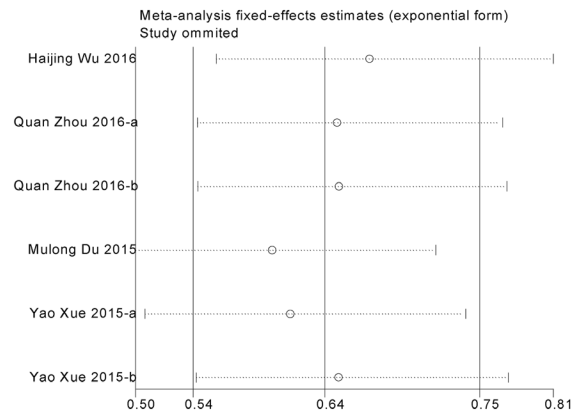

E

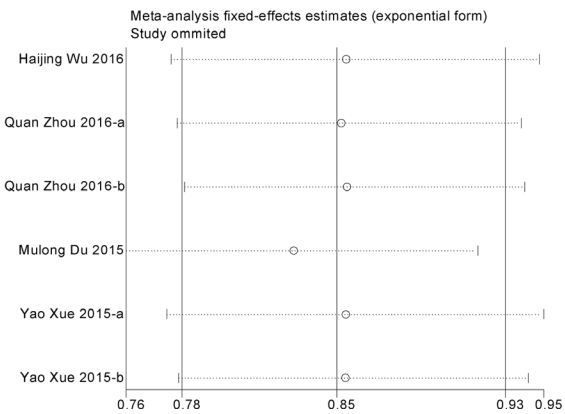

**Supplementary Figure 5: Sensitivity analyses for *HOTAIR* rs7958904 polymorphism and cancer. (A) allele model (C vs. G); (B) recessive model (CC vs. CG + GG); (C) dominant model (CG + CC vs. GG); (D) homozygous model (CC vs. GG); (E) heterozygous model (CG vs. GG).**

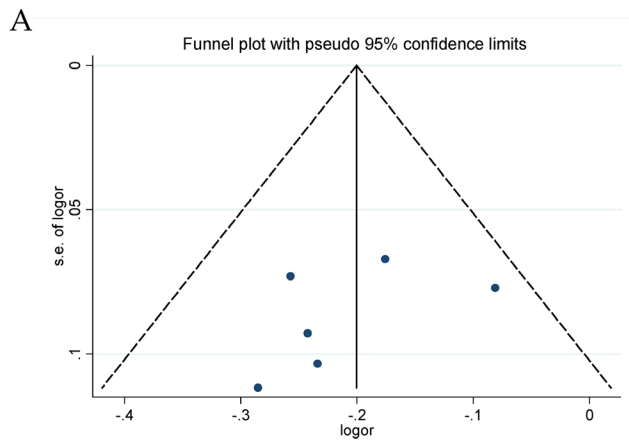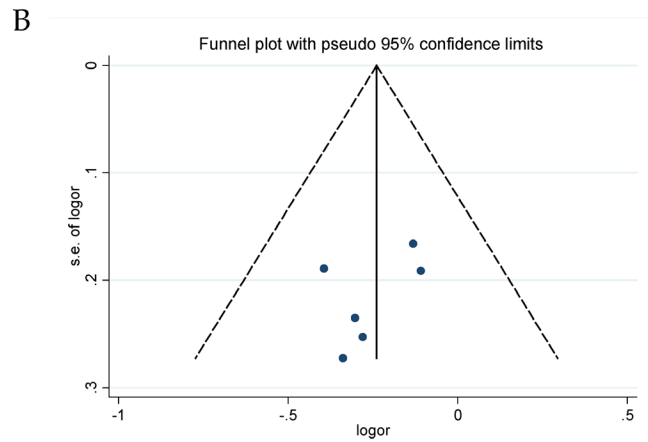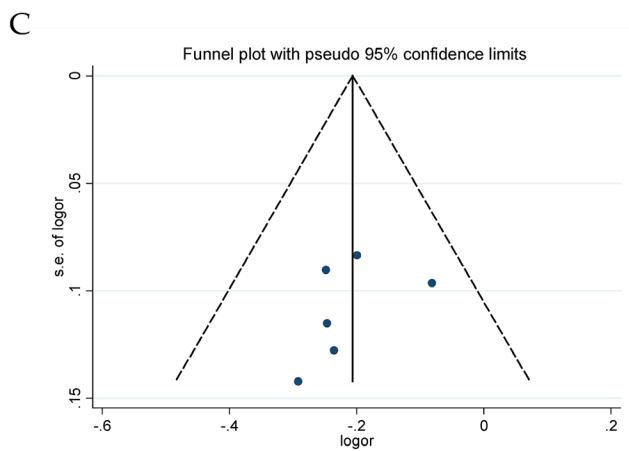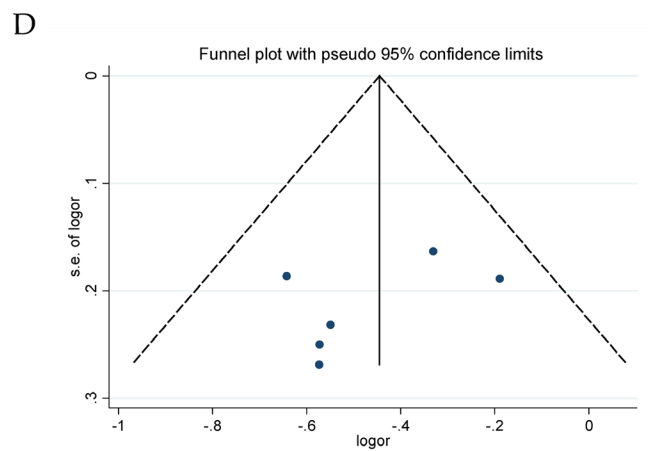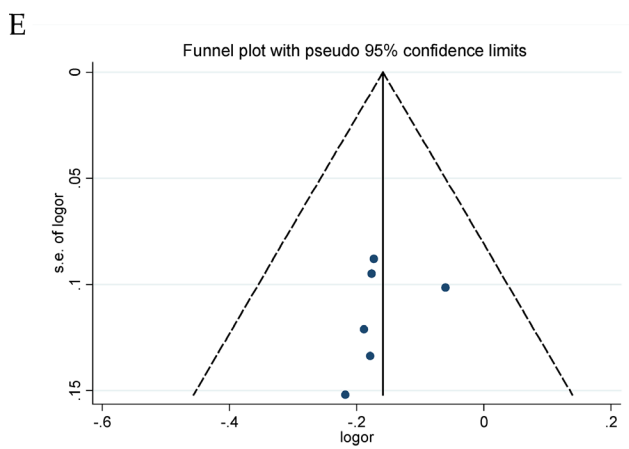

**Supplementary Figure 6: Funnel plots for *HOTAIR* rs7958904 polymorphism and cancer. (A) allele model (C vs. G); (B) recessive model (CC vs. CG + GG); (C) dominant model (CG + CC vs. GG); (D) homozygous model (CC vs. GG); (E) heterozygous model (CG vs. GG).**

A

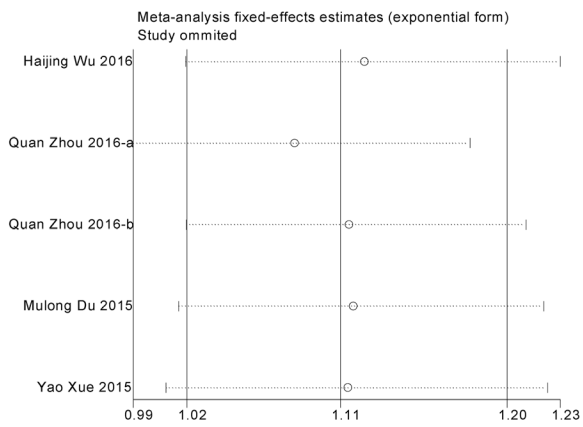

B

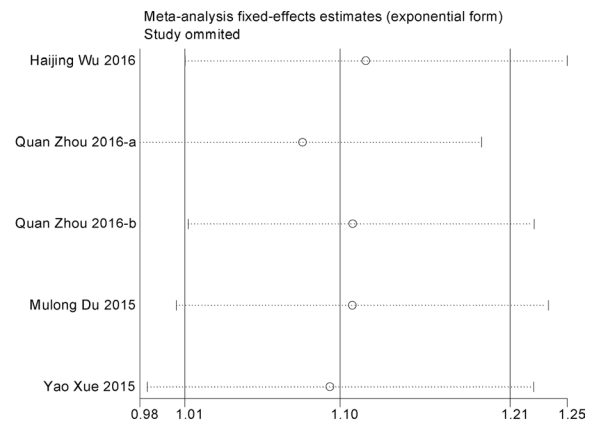

C

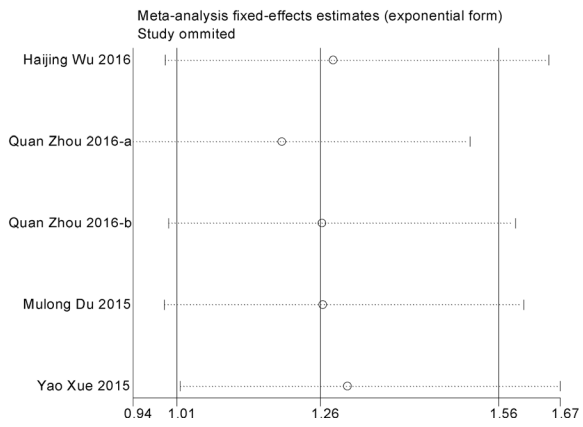

**Supplementary Figure 7: Sensitivity analyses for *HOTAIR* rs874945 polymorphism and cancer.** (A) allele model (A vs. G); (B) dominant model (AG + AA vs. GG); (C) homozygous model (AA vs. GG).

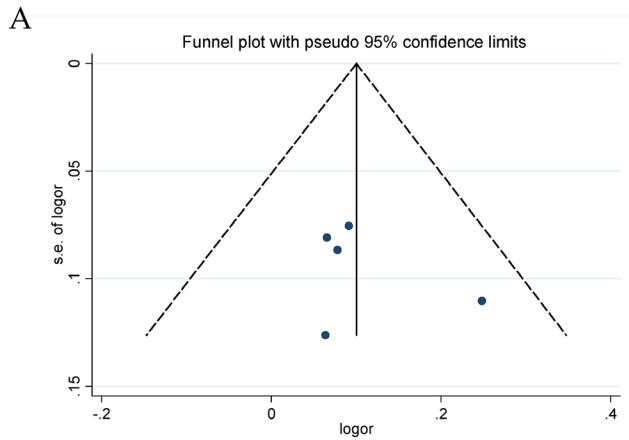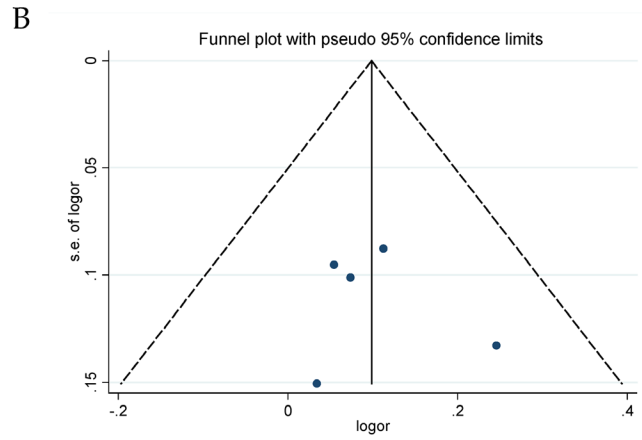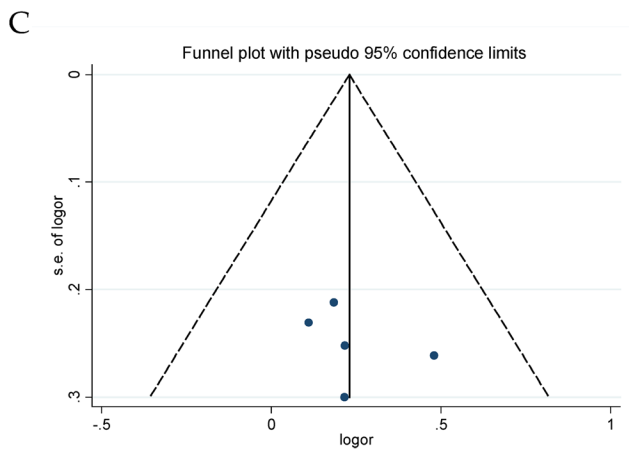

**Supplementary Figure 8: Funnel plots for *HOTAIR* rs874945 polymorphism and cancer.** (A) allele model (A vs. G); (B) dominant model (AG + AA vs. GG); (C) homozygous model (AA vs. GG).

**Supplementary Table 1: Characteristics of case-control studies on *HOTAIR* polymorphisms and cancer risk included in the meta-analysis.** See Supplementary\_Table\_1
